# Supplementary material for: Prevalence of symptomatic dry eye disease with associated risk factors among medical students at Chiang Mai University due to increased screen time and stress during COVID-19 pandemic
Source: PubMed Central journal article supplement (PMC8942203; doi:10.1371/journal.pone.0265733), 2022-03-23
Supplement: pone.0265733.s006.pdf [file pone.0265733.s006.pdf]

# แบบสอบถาม Ocular surface Index Score (OSDI)

แบบสอบถามนี้ประกอบด้วยคำถาม 12 ข้อ

ให้วงกลมตัวเลขที่อยู่ในกรอบสี่เหลี่ยมในแต่ละข้อตามคำตอบของผู้ตอบแบบสอบถาม หลังจากนั้นให้กรอกตัวเลขลงในกรอบสี่เหลี่ยม A, B, C, D และ E ตามคำแนะนำด้านล่าง

## ■ ใน 1 สัปดาห์ที่ผ่านมา ท่านเคยมีอาการต่อไปนี้หรือไม่ ?

|                              | มีอาการตลอดเวลา | มีอาการเป็นส่วนใหญ่ | มีอาการเป็นประมาณครึ่งหนึ่ง | มีอาการเป็นบางครั้ง | ไม่มีอาการเลย |
|------------------------------|-----------------|---------------------|-----------------------------|---------------------|---------------|
| 1. ตาสู้แสงจ้าไม่ได้         | 4               | 3                   | 2                           | 1                   | 0             |
| 2. รู้สึกมีตา กระพริบตาลำบาก | 4               | 3                   | 2                           | 1                   | 0             |
| 3. ปวดตาหรือเจ็บตา           | 4               | 3                   | 2                           | 1                   | 0             |
| 4. มองเห็นภาพเบลอ            | 4               | 3                   | 2                           | 1                   | 0             |
| 5. การมองเห็นแย่ง            | 4               | 3                   | 2                           | 1                   | 0             |

ผลรวมของคะแนนข้อ 1-5

(A)

## ■ ใน 1 สัปดาห์ที่ผ่านมา อาการข้างต้นมีผลกระทบต่อกิจกรรมเหล่านี้หรือไม่ ?

|                                       | มีผลกระทบตลอดเวลา | มีผลกระทบเป็นส่วนใหญ่ | มีผลกระทบเป็นประมาณครึ่งหนึ่ง | มีผลกระทบเป็นบางครั้ง | ไม่มีผลกระทบต่อเลย |        |
|---------------------------------------|-------------------|-----------------------|-------------------------------|-----------------------|--------------------|--------|
| 6. อ่านหนังสือ                        | 4                 | 3                     | 2                             | 1                     | 0                  | ไม่ตอบ |
| 7. ขับรถในเวลากลางคืน                 | 4                 | 3                     | 2                             | 1                     | 0                  | ไม่ตอบ |
| 8. มองหน้าจอคอมพิวเตอร์หรือหน้าจอ ATM | 4                 | 3                     | 2                             | 1                     | 0                  | ไม่ตอบ |
| 9. ดูโทรทัศน์                         | 4                 | 3                     | 2                             | 1                     | 0                  | ไม่ตอบ |

ผลรวมของคะแนนข้อ 6-9

(B)

## ■ ใน 1 สัปดาห์ที่ผ่านมา ท่านรู้สึกไม่สบายตาในสถานการณ์เหล่านี้หรือไม่ ?

|                                        | ไม่สบายตาตลอดเวลา | ไม่สบายตาเป็นส่วนใหญ่ | ไม่สบายตาเป็นประมาณครึ่งหนึ่ง | ไม่สบายตาเป็นบางครั้ง | ไม่มีอาการเลย |        |
|----------------------------------------|-------------------|-----------------------|-------------------------------|-----------------------|---------------|--------|
| 10. เมื่อมีลมพัดแรง                    | 4                 | 3                     | 2                             | 1                     | 0             | ไม่ตอบ |
| 11. เมื่ออยู่ในสถานที่ที่มีความชื้นต่ำ | 4                 | 3                     | 2                             | 1                     | 0             | ไม่ตอบ |
| 12. เมื่ออยู่ในห้องปรับอากาศ           | 4                 | 3                     | 2                             | 1                     | 0             | ไม่ตอบ |

ผลรวมของคะแนนข้อ 10-12

(C)

ผลรวมของคะแนนในช่อง A, B และ C

(D)

จำนวนคำถามที่ได้รับคำตอบ

(E)
